# Supplementary material
Source: PubMed Central journal article supplement (PMC8344361)
Supplement: NIHMS1638049-supplement-1.pdf [file NIHMS1638049-supplement-1.pdf]

**Supplementary Tables****Supplementary Table 1:** ICD-9 Diagnosis and Procedural Codes

| <i>Diagnosis</i>                      | <i>ICD CODE</i>                                                           |
|---------------------------------------|---------------------------------------------------------------------------|
| <b>STEMI</b>                          | 410.0x, 410.1x, 410.2x, 410.3x, 410.4x, 410.5x,<br>410.6x, 410.8x, 410.9x |
| <b>Cardiogenic Shock</b>              | 785.51                                                                    |
| <b>Mechanical Circulatory Support</b> |                                                                           |
| ➤ Intra-aortic balloon pump           | 37.61                                                                     |
| ➤ Percutaneous vascular assist device | 37.68 and 37.62                                                           |
| ➤ Extracorporeal membrane oxygenation | 39.6539.66                                                                |
| <b>Bleeding complication:</b>         |                                                                           |
| ➤ Transfusion                         | 99.00-99.09, V58.2, E873.0, E934.7, E876.0                                |
| ➤ Hemorrhage or hematoma              | 998.11, 998.12                                                            |

|                                                             |                                                                                                                                            |
|-------------------------------------------------------------|--------------------------------------------------------------------------------------------------------------------------------------------|
| ➤ Percutaneous or surgical intervention to control bleeding | 34.09, 21.01-21.09, 42.33, 45.43, 44.44, 54.19, 39.41, 60.94, 6.02, 34.03, 54.12, 49.95, 57.93                                             |
| <b>Limb Ischemia</b>                                        |                                                                                                                                            |
| ➤ Acute Limb Ischemia                                       | 444.0, 444.22, 444.81                                                                                                                      |
| ➤ Procedural interventions                                  | 38.06, 38.08, 38.16, 38.18, 38.46, 38.48, 39.25, 39.29, 39.49, 39.56, 39.57, 99.10, 39.50, 39.90, 00.55, 84.13, 84.14, 84.15, 84.16, 84.17 |

**Supplementary table 2:** List of Elixhauser comorbidities

| No. | Comorbidities                                                                 |
|-----|-------------------------------------------------------------------------------|
| 1   | Congestive heart failure                                                      |
| 2   | Cardiac arrhythmias                                                           |
| 3   | Valvular disease                                                              |
| 4   | Pulmonary circulation disorders                                               |
| 5   | Peripheral vascular disorders                                                 |
| 6   | Hypertension (combined) Hypertension, uncomplicated Hypertension, complicated |
| 7   | Paralysis                                                                     |
| 8   | Other neurological disorders                                                  |
| 9   | Chronic pulmonary disease                                                     |
| 10  | Diabetes, uncomplicated                                                       |
| 11  | Diabetes, complicated                                                         |
| 12  | Hypothyroidism                                                                |
| 13  | Renal failure                                                                 |
| 14  | Liver disease                                                                 |
| 15  | Peptic ulcer disease excluding bleeding                                       |
| 16  | AIDS                                                                          |
| 17  | Lymphoma                                                                      |
| 18  | Metastatic cancer                                                             |
| 19  | Solid tumor without metastasis                                                |
| 20  | Rheumatoid arthritis/collagen vascular disease                                |
| 21  | Coagulopathy                                                                  |
| 22  | Obesity                                                                       |
| 23  | Weight loss                                                                   |

|    |                                 |
|----|---------------------------------|
| 24 | Fluid and electrolyte disorders |
| 25 | Blood loss anemia               |
| 26 | Deficiency anemias              |
| 27 | Alcohol abuse                   |
| 28 | Drug abuse                      |
| 29 | Psychoses                       |
| 30 | Depression                      |

For Review Only

**Supplementary Table 3:** Baseline characteristics of patients with and without bleeding complications for patients with No MCS, IABP, PVAD or ECMO.

|                                                 | No MCS                 |       |         | IABP                   |        |         | PVAD                   |       |         | ECMO                   |       |         |
|-------------------------------------------------|------------------------|-------|---------|------------------------|--------|---------|------------------------|-------|---------|------------------------|-------|---------|
|                                                 | Bleeding Complications |       |         | Bleeding Complications |        |         | Bleeding Complications |       |         | Bleeding Complications |       |         |
|                                                 | No                     | Yes   | p-value | No                     | Yes    | p-value | No                     | Yes   | p-value | No                     | Yes   | p-value |
| Female                                          | 41.1%                  | 48.2% | <0.001  | 29.8%                  | 38.5%  | <0.001  | 26.0%                  | 22.8% | 0.125   | 40.4%                  | 22.4% | <0.001  |
| <b>RACE</b>                                     |                        |       |         |                        |        |         |                        |       |         |                        |       |         |
| White                                           | 66.3%                  | 64.9% | <0.001  | 63.60%                 | 65.60% | <0.001  | 64.5%                  | 66.3% | 0.035   | 52.7%                  | 51.7% | 0.001   |
| Black                                           | 5.4%                   | 6.7%  |         | 5.30%                  | 5.90%  |         | 7.9%                   | 5.5%  |         | 4.9%                   | 6.2%  |         |
| Hispanic                                        | 5.6%                   | 7.4%  |         | 6.30%                  | 8.50%  |         | 6.1%                   | 7.9%  |         | 2.5%                   | 10.3% |         |
| Asian or Pacific Islander                       | 2.2%                   | 4.0%  |         | 2.40%                  | 3.30%  |         | 2.4%                   | 3.2%  |         | 0.0%                   | 2.1%  |         |
| Native American                                 | 0.5%                   | 0.4%  |         | 0.50%                  | 0.50%  |         | 1.0%                   | 0.0%  |         | 2.5%                   | 0.0%  |         |
| Other                                           | 3.2%                   | 3.8%  |         | 3.60%                  | 4.40%  |         | 5.0%                   | 5.3%  |         | 13.8%                  | 12.4% |         |
| <b>Primary expected payer</b>                   |                        |       |         |                        |        |         |                        |       |         |                        |       |         |
| Medicare                                        | 59.9%                  | 63.7% | <0.001  | 47.0%                  | 53.6%  | <0.001  | 43.2%                  | 35.4% | <0.001  | 34.0%                  | 18.7% | 0.003   |
| Medicaid                                        | 6.4%                   | 7.4%  |         | 8.0%                   | 7.7%   |         | 10.6%                  | 10.3% |         | 9.4%                   | 10.0% |         |
| Private Insurance                               | 24.3%                  | 21.7% |         | 33.0%                  | 28.9%  |         | 33.2%                  | 40.1% |         | 44.3%                  | 54.8% |         |
| Self-pay                                        | 6.0%                   | 5.1%  |         | 7.8%                   | 6.5%   |         | 9.1%                   | 7.9%  |         | 9.9%                   | 10.4% |         |
| No charge                                       | 0.5%                   | 0.3%  |         | 0.7%                   | 0.5%   |         | 1.4%                   | 0.8%  |         | 0.0%                   | 2.1%  |         |
| Other                                           | 2.8%                   | 1.9%  |         | 3.4%                   | 2.8%   |         | 2.6%                   | 5.5%  |         | 2.5%                   | 4.1%  |         |
| <b>Median household income</b>                  |                        |       | <0.001  |                        |        | <0.001  |                        |       | <0.001  |                        |       | 0.08    |
| 0-25 <sup>th</sup> percentile                   | 28.1%                  |       |         | 26.3%                  | 24.6%  |         | 31.4%                  | 22.4% |         | 17.2%                  | 12.0% |         |
|                                                 |                        | 25.8% |         |                        |        |         |                        |       |         |                        |       |         |
| 26 <sup>th</sup> – 50 <sup>th</sup> percentile  | 27.0%                  | 26.2% |         | 27.3%                  | 26.1%  |         | 29.1%                  | 31.0% |         | 23.2%                  | 33.2% |         |
| 51 <sup>st</sup> - 75 <sup>th</sup> percentile  | 24.1%                  | 24.2% |         | 25.1%                  | 24.4%  |         | 22.8%                  | 23.6% |         | 26.1%                  | 26.1% |         |
| 76 <sup>th</sup> – 100 <sup>th</sup> percentile | 20.8%                  | 23.8% |         | 21.3%                  | 24.9%  |         | 16.7%                  | 23.1% |         | 33.5%                  | 28.6% |         |
| <b>Comorbidities</b>                            |                        |       |         |                        |        |         |                        |       |         |                        |       |         |
| Diabetes                                        | 29.4%                  | 33.1% | <0.001  | 28.9%                  | 33.1%  | <0.001  | 34.4%                  | 30.2% | 0.06    | 11.8%                  | 22.5% | 0.01    |
| Alcohol abuse                                   | 3.8%                   | 4.3%  | 0.01    | 4.3%                   | 4.6%   | 0.103   | 3.4%                   | 3.1%  | 0.71    | 2.5%                   | 2.1%  | 0.78    |
| Chronic blood loss anemia                       | 0.9%                   | 4.3%  | <0.001  | 1.0%                   | 3.4%   | <0.001  | 1.0%                   | 2.4%  | 0.02    | NA                     | NA    | NA      |

|                                     |       |       |        |       |       |        |       |       |        |       |       |        |
|-------------------------------------|-------|-------|--------|-------|-------|--------|-------|-------|--------|-------|-------|--------|
| Congestive Heart Failure            | 1.7%  | 4.8%  | <0.001 | 2.4%  | 3.6%  | <0.001 | 2.6%  | 1.6%  | 0.16   | 41.4% | 40.4% | 0.84   |
| Liver disease                       | 1.4%  | 1.8%  | 0.001  | 1.1%  | 1.4%  | <0.001 | 2.0%  | 0.8%  | 0.05   | NA    | NA    | NA     |
| Obesity                             | 8.9%  | 9.7%  | 0.01   | 9.9%  | 11.4% | <0.001 | 10.8% | 9.6%  | 0.44   | 14.8% | 11.7% | 0.33   |
| Peripheral vascular disorders       | 11.3% | 15.1% | <0.001 | 7.6%  | 11.7% | <0.001 | 12.3% | 14.5% | 0.17   | 21.2% | 10.4% | 0.01   |
| Pulmonary circulation disorders     | 0.1%  | 0.4%  | <0.001 | 0.2%  | 0.4%  | <0.001 | 0.0%  | 1.0%  | <0.001 | 4.9%  | 2.1%  | 0.1    |
| Deficiency anemias                  | 14.5% | 31.0% | <0.001 | 14.5% | 28.7% | <0.001 | 15.6% | 28.4% | <0.001 | 4.9%  | 26.7% | <0.001 |
| Chronic pulmonary disease           | 22.1% | 25.1% | 0.06   | 19.0% | 21.1% | <0.001 | 16.4% | 13.5% | 0.09   | 9.4%  | 6.2%  | 0.216  |
| Coagulopathy                        | 7.2%  | 18.8% | <0.001 | 13.5% | 26.5% | <0.001 | 21.8% | 40.0% | <0.001 | 33.0% | 42.9% | 0.03   |
| Dyslipidemia                        | 39.7% | 35.7% | <0.001 | 40.0% | 38.3% | <0.001 | 38.3% | 47.2% | 0.01   | 24.6% | 22.4% | 0.581  |
| Renal failure                       | 16.8% | 21.1% | <0.001 | 11.4% | 16.8% | <0.001 | 16.6% | 17.0% | <0.001 | 12.3% | 8.3%  | 0.16   |
| h/o MI                              | 7.3%  | 6.0%  | <0.001 | 6.0%  | 6.2%  | 0.469  | 9.2%  | 6.3%  | 0.03   | 4.9%  | 6.2%  | 0.55   |
| h/o PCI                             | 8.6%  | 8.6%  | 0.934  | 7.0%  | 6.8%  | 0.295  | 11.5% | 11.7% | 0.90   | 14.3% | 16.3% | 0.57   |
| h/o CABG                            | 4.1%  | 3.0%  | <0.001 | 1.6%  | 1.4%  | 0.009  | 3.1%  | 1.6%  | 0.05   | 4.9%  | 0.0%  | 0.01   |
| h/o Atrial fibrillation             | 22.8% | 26.0% | <0.001 | 20.4% | 26.4% | <0.001 | 19.7% | 20.1% | 0.85   | 12.3% | 16.3% | 0.23   |
| Drug Abuse                          | 1.9%  | 1.6%  | 0.03   | 1.9%  | 2.4%  | <0.001 | 4.5%  | 4.7%  | 0.90   | 0.0%  | 2.1%  | 0.04   |
| Fluid and electrolyte disorders     | 38.4% | 51.0% | <0.001 | 40.4% | 49.2% | <0.001 | 53.4% | 60.5% | 0.01   | 67.0% | 62.7% | 0.34   |
| <b>Revascularization strategies</b> |       |       |        |       |       |        |       |       |        |       |       |        |
| CABG during current admission       | 5.5%  | 20.6% | <0.001 | 17.5% | 40.4% | <0.001 | 4.4%  | 17.5% | <0.001 | 16.7% | 20.4% | 0.32   |
| PCI during current admission        | 54.9% | 45.9% | <0.001 | 78.3% | 60.9% | <0.001 | 83.0% | 60.9% | <0.001 | 23.6% | 24.6% | 0.82   |

**Supplementary Table 4:** Baseline characteristics of patients with and without acute limb ischemia for patients with No MCS, IABP, PVAD or ECMO.

|                                 | No MCS |       |         | IABP   |       |         | PVAD   |       |         | ECMO   |       |         |
|---------------------------------|--------|-------|---------|--------|-------|---------|--------|-------|---------|--------|-------|---------|
|                                 | No ALI | ALI   | p-value |
| Female                          | 42.2%  | 44.2% | 0.30    | 31.4%  | 41.0% | <0.001  | 24.5%  | 40.5% | <0.002  | 28.5%  | 55.9% | 0.001   |
| <b>Race</b>                     |        |       | 0.14    |        |       | <0.001  |        |       | <0.001  | 52.8%  | 45.5% | 0.058   |
| White                           | 66.1%  | 64.2% |         | 64.0%  | 64.0% |         | 63.9%  | 93.3% |         | 6.1%   | 0.0%  |         |
| Black                           | 5.6%   | 7.0%  |         | 5.4%   | 5.5%  |         | 7.2%   | 6.7%  |         | 7.3%   | 0.0%  |         |
| Hispanic                        | 5.9%   | 6.2%  |         | 6.8%   | 8.4%  |         | 6.9%   | 0.0%  |         | 1.2%   | 0.0%  |         |
| Asian or Pacific Islander       | 2.5%   | 1.4%  |         | 2.6%   | 0.0%  |         | 2.7%   | 0.0%  |         | 1.2%   | 0.0%  |         |
| Native American                 | 0.5%   | 0.0%  |         | 0.5%   | 0.0%  |         | 0.7%   | 0.0%  |         | 11.7%  | 27.3% |         |
| Other                           | 3.3%   | 3.6%  |         | 3.7%   | 6.2%  |         | 5.3%   | 0.0%  |         |        |       |         |
| <b>Comorbidities</b>            |        |       |         |        |       |         |        |       |         |        |       |         |
| Hypertension                    | 53.8%  | 47.9% | 0.003   | 50.4%  | 44.0% | <0.001  | 52.3%  | 33.3% | 0.001   | 38.0%  | 15.2% | 0.009   |
| Congestive Heart Failure        | 2.2%   | 5.2%  | <0.001  | 2.6%   | 3.9%  | 0.02    | 2.1%   | 6.7%  | 0.01    | 40.6%  | 44.1% | 0.69    |
| Peripheral vascular disorders   | 11.4%  | 72.1% | <0.001  | 7.8%   | 72.4% | <0.001  | 10.2%  | 86.7% | <0.001  | 9.5%   | 84.8% | <0.001  |
| Cardiac Arrest                  | 19.1%  | 23.6% | 0.004   | 21.7%  | 20.9% | 0.58    | 30.8%  | 45.9% | 0.006   | 27.3%  | 15.2% | 0.12    |
| Dyslipidemia                    | 39.2%  | 28.7% | <0.001  | 39.8%  | 27.7% | <0.001  | 41.5%  | 26.7% | 0.01    | 24.1%  | 15.2% | 0.24    |
| Alcohol abuse                   | 3.9%   | 2.2%  | 0.02    | 4.4%   | 4.3%  | 0.94    | 3.4%   | 0.0%  | 0.12    | 2.4%   | 0.0%  | 0.36    |
| Pulmonary circulation disorders | 0.2%   | 0.0%  | 0.27    | 0.2%   | 2.5%  | <0.001  | 0.3%   | 0.0%  | 0.63    | 3.7%   | 0.0%  | 0.26    |
| Deficiency anemias              | 17.1%  | 17.4% | 0.81    | 17.3%  | 16.8% | 0.70    | 20.2%  | 0.0%  | <0.001  | 15.6%  | 30.3% | 0.02    |
| Chronic pulmonary disease       | 22.6%  | 22.0% | 0.72    | 19.4%  | 26.3% | <0.001  | 15.6%  | 13.3% | 0.59    | 8.3%   | 0.0%  | 0.08    |
| Coagulopathy                    | 9.0%   | 13.6% | <0.001  | 16.0%  | 26.6% | <0.001  | 27.3%  | 25.7% | 0.75    | 39.2%  | 29.4% | 0.26    |
| Diabetes                        | 30.0%  | 30.3% | 0.87    | 29.7%  | 24.0% |         | 33.1%  | 33.3% | 0.96    | 17.8%  | 15.2% | 0.70    |
| Renal failure                   | 17.5%  | 13.5% | 0.007   | 12.5%  | 13.0% | 0.61    | 16.6%  | 20.3% | 0.40    | 10.9%  | 0.0%  | 0.04    |
| Fluid and electrolyte disorders | 40.3%  | 55.6% | <0.001  | 42.0%  | 56.3% | <0.001  | 55.8%  | 47.3% | 0.14    | 64.0%  | 72.7% | 0.31    |
| Liver disease                   | 1.5%   | 1.6%  | 0.81    | 1.1%   | 2.0%  | 0.022   | 1.4%   | 6.7%  | <0.001  | 0%     | 0%    |         |
| Obesity                         | 9.0%   | 7.9%  | 0.32    | 10.2%  | 7.1%  | 0.003   | 10.1%  | 20.0% | 0.006   | 11.7%  | 30.3% | 0.002   |
| Drug Abuse                      | 1.8%   | 0.8%  | 0.05    | 2.0%   | 0.0%  | <0.001  | 4.7%   | 0.0%  | 0.05    | 1.2%   | 0.0%  | 0.52    |
| h/o MI                          | 7.1%   | 3.8%  | 0.001   | 6.0%   | 4.8%  | 0.15    | 8.2%   | 12.2% | 0.22    | 6.1%   | 0.0%  | 0.14    |

|                                     |       |       |        |       |       |        |       |       |       |       |       |       |
|-------------------------------------|-------|-------|--------|-------|-------|--------|-------|-------|-------|-------|-------|-------|
| h/o PCI                             | 8.6%  | 8.1%  | 0.62   | 7.0%  | 5.6%  | 0.11   | 11.8% | 6.7%  | 0.17  | 16.8% | 0.0%  | 0.01  |
| h/o CABG                            | 3.9%  | 0.8%  | <0.001 | 1.6%  | 2.6%  | 0.01   | 2.7%  | 0.0%  | 0.14  | 2.4%  | 0.0%  | 0.36  |
| h/o Atrial fibrillation             | 23.4% | 22.5% | 0.61   | 21.6% | 23.0% | 0.33   | 19.5% | 26.7% | 0.12  | 15.6% | 0.0%  | 0.01  |
| h/o smoking                         | 30.6% | 29.9% | 0.70   | 30.5% | 30.9% | 0.79   | 38.1% | 33.3% | 0.40  | 23.9% | 12.1% | 0.12  |
| h/o CVA                             | 5.4%  | 4.7%  | 0.46   | 3.7%  | 4.2%  | 0.40   | 4.5%  | 0.0%  | 0.06  | 6.1%  | 0.0%  | 0.14  |
| <b>Revascularization strategies</b> |       |       |        |       |       |        |       |       |       |       |       |       |
| PCI during current admission        | 54.3% | 54.4% | 0.93   | 75.0% | 65.8% | <0.001 | 76.3% | 81.1% | 0.34  | 22.9% | 42.4% | 0.01  |
| CABG during current admission       | 7.9%  | 9.8%  | 0.07   | 21.9% | 30.4% | <0.001 | 8.4%  | 6.7%  | 0.59  | 20.2% | 0.0%  | 0.004 |
| <b>Expected primary payer</b>       |       |       | <0.001 |       |       |        |       |       | 0.003 |       |       | 0.24  |
| Medicare                            | 60.6% | 53.0% |        | 48.4% | 40.4% | <0.001 | 40.6% | 47.3% |       | 25.2% | 29.4% |       |
| Medicaid                            | 6.6%  | 6.8%  | 8.0%   | 10.7% |       |        | 10.2% | 20.3% |       | 9.5%  | 14.7% |       |
| Private                             | 23.8% | 33.4% | 32.2%  | 35.0% |       |        | 35.3% | 32.4% |       | 49.5% | 55.9% |       |
| <b>Elixhauser Comorbidities</b>     |       |       | <0.001 |       |       | <0.001 |       |       | 0.008 |       |       | 0.001 |
| 0                                   | 9.3%  | 5.1%  |        | 10.8% | 1.1%  |        | 6.0%  | 0.0%  |       | 4.9%  | 14.7% |       |
| 1-3                                 | 63.3% | 53.6% |        | 63.9% | 54.5% |        | 61.4% | 53.3% |       | 55.9% | 26.5% |       |
| ≥4                                  | 27.4% | 41.3% |        | 25.3% | 44.4% |        | 32.6% | 46.7% |       | 39.3% | 58.8% |       |



**Supplementary Table 5:** Adjusted risk of having an event of bleeding complications and ALI among patients with IABP, PVAD or ECMO in comparison to those with no MCS.

|             | Bleeding Complications                       | ALI                                          |
|-------------|----------------------------------------------|----------------------------------------------|
| Device type | Adjusted OR (95% CI)/ p - value <sup>a</sup> | Adjusted OR (95% CI)/ p - value <sup>a</sup> |
| No MCS      | (reference)                                  | (reference)                                  |
| IABP        | 1.11 (1.08 - 1.14)/<0.001                    | 1.37 (1.23 - 1.53) /<0.001                   |
| PVAD        | 2.34 (2.15 - 2.63) /<0.001                   | 3.97 (3.04 – 5.19) /<0.001                   |
| ECMO        | 4.89 (3.99 – 5.99) /<0.001                   | 7.34 (4.81-11.20) /<0.001                    |

<sup>a</sup>Adjusted for: Age, Gender, race, DM, Smoking, Obesity, Htn, HLD, Ischemic heart disease, CKD, CHF ESRD, PVD, COPD, Thrombocytopenia, Cirrhosis, prior CABG, prior MI, previous heart transplantation, previous VTE, coagulopathy, deficiency anemia, anticoagulation treatment, CABG current admission, fibrinolytic therapy.

**Supplementary Table 6:** Adjusted adverse event risk by number of transfusions in patients with CS-STEMI and bleeding complications.

| CS with STEMI (Total)     |                                           |                              |         |
|---------------------------|-------------------------------------------|------------------------------|---------|
| No. of transfusion events | In Hospital mortality (% of total number) | Adjusted odd ratio* (95% CI) | P-value |
| No transfusion            | 30%                                       | 1 (reference)                |         |
| 1 transfusion             | 28%                                       | 0.83 (0.76-0.90)             | <0.001  |
| 2 transfusion             | 32%                                       | 1.43 (1.19-1.71)             | <0.001  |
| ≥3 transfusion            | 25%                                       | 1.41 (1.11-1.77)             | 0.004   |

<sup>\*</sup>Adjusted for: Age, Gender, race, DM, Smoking, Obesity, Htn, HLD, Ischemic heart disease, CKD, CHF ESRD, PVD, COPD, Thrombocytopenia, Cirrhosis, prior CABG, prior MI, previous heart transplantation, previous VTE, coagulopathy, deficiency anemia, anticoagulation treatment, CABG current admission, fibrinolytic therapy.

**Supplementary Table 7:** In-hospital mortality with and without surgical/endovascular intervention in patients with ALI.

| Outcome by procedure type              | In- Hospital mortality in patients with Acute limb ischemic requiring surgical/endovascular intervention* |                                 | P VALUE |
|----------------------------------------|-----------------------------------------------------------------------------------------------------------|---------------------------------|---------|
|                                        | <u>With surgical or endovascular intervention</u>                                                         | <u>Without any intervention</u> |         |
| Cardiogenic shock with STEMI           | 278/825<br>(33.7%)                                                                                        | 307/803<br>(38.2%)              | 0.057   |
| CS with STEMI without MCS              | 112/269<br>(41.6%)                                                                                        | 152/362<br>(42.0%)              | 0.92    |
| CS with STEMI and IABP                 | 125/461<br>(27.1%)                                                                                        | 107/344<br>(31.1%)              | 0.21    |
| CS with STEMI and PVAD                 | 10/35<br>(28.6%)                                                                                          | 15/39<br>(38.5%)                | 0.36    |
| CS with STEMI and ECMO                 | 10/24<br>(41.7%)                                                                                          | 10/10<br>(100%)                 | 0.002   |
| *Included patients only developing ALI |                                                                                                           |                                 |         |
